# Supplementary material
Source: MDPI journal article supplement (https://www.mdpi.com/2071-1050/12/4/1532)
Supplement: s1 [file s1]

## REPORT TEMPLATE FOR LOCAL WORKSHOPS

*Filled in by the EWG member after the workshop*

### **I. General description of the workshop:**

Time and place:

Number of participants:

General atmosphere in the workshop:

Notes concerning e.g. group dynamics, participants' activity, facilitators' role etc.:

### **II. Ice breaker activity, connotation exercise**

Listing and grouping the themes that people associate with biodiversity:

### III. Group work sessions

Elaborating on the importance and effects of biodiversity and nature and their links to people's lives  
(main topics that emerged and discussion of them)

Results of the ranking/voting on the most urgent or relevant effects of biodiversity loss

1. \_\_\_\_\_
2. \_\_\_\_\_
3. \_\_\_\_\_
4. \_\_\_\_\_
5. \_\_\_\_\_

Other notes on this activity:

**2a. Personal action.** Description and grouping the suggested (concrete) measures for conserving biodiversity:

Results of the ranking/voting for individual measures to halt biodiversity loss

1. \_\_\_\_\_
2. \_\_\_\_\_
3. \_\_\_\_\_
4. \_\_\_\_\_
5. \_\_\_\_\_

Other notes on this activity:

**2b. Collective societal action.** Description and grouping the suggested measures for promoting pro-environmental behaviour and taking collective action for halting biodiversity loss.

Results of the ranking/voting for collective measures to halt biodiversity loss

1. \_\_\_\_\_
2. \_\_\_\_\_
3. \_\_\_\_\_
4. \_\_\_\_\_
5. \_\_\_\_\_

Other notes on this activity:

**2c. Political action.** Description and grouping the suggested needs from different level policy-makers and questions that participants would like to ask from policy-makers and how to be engaged.

Results of the ranking/voting for political measures to halt biodiversity loss

1. \_\_\_\_\_
2. \_\_\_\_\_
3. \_\_\_\_\_
4. \_\_\_\_\_
5. \_\_\_\_\_

Results of the ranking/voting for how people would want to be engaged in policy making

1. \_\_\_\_\_
2. \_\_\_\_\_
3. \_\_\_\_\_
4. \_\_\_\_\_
5. \_\_\_\_\_

Other notes on this activity

#### **IV. Debriefing**

Notes from the debriefing session discussions.

Top three action points which should be included in the new EU Biodiversity Strategy:

1. \_\_\_\_\_
2. \_\_\_\_\_
3. \_\_\_\_\_

## VI. Reflection of workshop against scientific key messages

**Attachment:** The workshop surveys
