# Supplementary material
Source: MDPI journal article supplement (https://www.mdpi.com/2071-1050/12/4/1532)
Supplement: s1 [file s1]

## WORKSHOP SURVEY

Welcome to the EKLIPSE workshop. We are excited to discuss the new EU Biodiversity Strategy with you today. During and after the workshop it would be great that you fill in this small survey. The facilitators will instruct you on when to respond each question. Enjoy the conversations!

Country of residence: \_\_\_\_\_

Age: \_\_\_\_\_

Sex: \_\_\_\_\_

Occupation: \_\_\_\_\_

**My biggest environmental concern is...**

\_\_\_\_\_

**What is biodiversity to me? Write the first thing that comes to mind!**

\_\_\_\_\_

\_\_\_\_\_

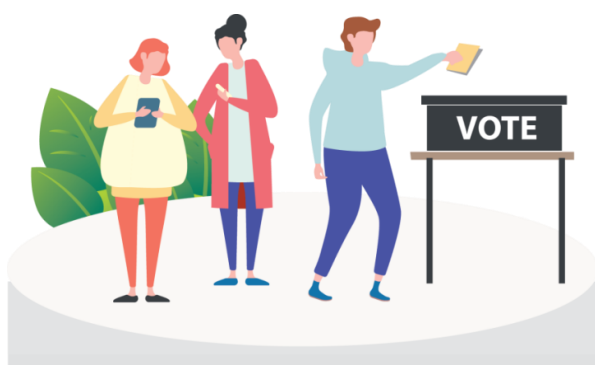

**Biodiversity loss affects my life...**

1. \_\_\_\_\_

\_\_\_\_\_

2. \_\_\_\_\_

\_\_\_\_\_

3. \_\_\_\_\_

\_\_\_\_\_

4. \_\_\_\_\_

\_\_\_\_\_

5. \_\_\_\_\_

\_\_\_\_\_

**1. What can I as an individual do to protect biodiversity?**

1. \_\_\_\_\_

\_\_\_\_\_

2. \_\_\_\_\_

\_\_\_\_\_

3. \_\_\_\_\_

4. \_\_\_\_\_

5. \_\_\_\_\_

**My main source of information on the environment is (pick three):**

- ☐ Television news
- ☐ Newspapers
- ☐ The radio
- ☐ Social networks and the internet
- ☐ Friends and family
- ☐ Television documentaries and films

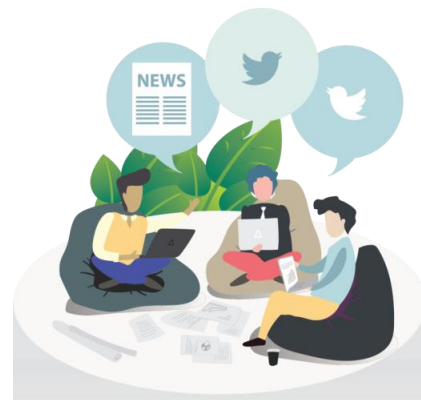

**2. How would you like to be engaged into collective action for biodiversity?**

1. \_\_\_\_\_

2. \_\_\_\_\_

3. \_\_\_\_\_

4. \_\_\_\_\_

5. \_\_\_\_\_

**3. How would you like to participate in policy formulation?**

1. \_\_\_\_\_

2. \_\_\_\_\_

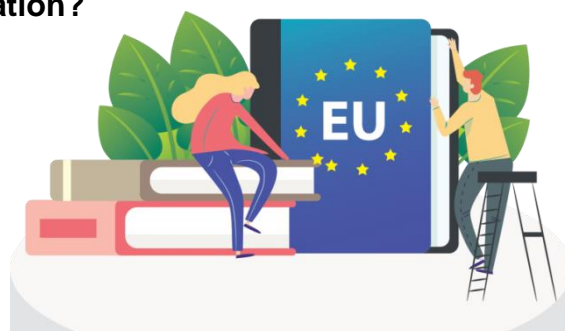

3. \_\_\_\_\_

4. \_\_\_\_\_

5. \_\_\_\_\_

#### 4. My action point for the new EU Biodiversity Strategy

#### 5. Actors

Please evaluate the following statements on the scale of 1-4

(1= doing too much 2= doing about the right amount 3= not doing enough 4= don't know)

**In your opinion is each of the following currently doing too much, about the right amount or not doing enough to protect the environment?**

|                             |   |   |   |   |
|-----------------------------|---|---|---|---|
| a. I myself                 | 1 | 2 | 3 | 4 |
| b. My community             | 1 | 2 | 3 | 4 |
| c. Businesses               | 1 | 2 | 3 | 4 |
| d. National decision-makers | 1 | 2 | 3 | 4 |
| e. EU decision-makers       | 1 | 2 | 3 | 4 |

#### 6. Awareness after the workshop

Please evaluate the following statements by circling a number from 1 to 5

(1 = strongly disagree 2= disagree 3= neither agree or disagree 4= agree 5= strongly agree)

|                                                                  |   |   |   |   |   |
|------------------------------------------------------------------|---|---|---|---|---|
| a. I am now more aware of biodiversity and issues related to it. | 1 | 2 | 3 | 4 | 5 |
| b. I am now more aware of solutions to biodiversity issues       | 1 | 2 | 3 | 4 | 5 |
| c. I am worried about the environment                            | 1 | 2 | 3 | 4 | 5 |
| d. I think it is important to protect biodiversity               | 1 | 2 | 3 | 4 | 5 |
| e. It is important to facilitate participation of citizens in:   |   |   |   |   |   |
| - EU:n policy making                                             | 1 | 2 | 3 | 4 | 5 |
| - National policy making                                         | 1 | 2 | 3 | 4 | 5 |
| - Local policy making                                            | 1 | 2 | 3 | 4 | 5 |

#### 7. Feelings about the workshop

|                                                                          |   |   |   |   |   |
|--------------------------------------------------------------------------|---|---|---|---|---|
| a. I felt comfortable during the event and was able express my thoughts. | 1 | 2 | 3 | 4 | 5 |
| b. I would take part in a similar citizen participation event again      | 1 | 2 | 3 | 4 | 5 |
| c. An overall score for the event (1= terrible, 5= excellent):           | 1 | 2 | 3 | 4 | 5 |

**Open comments about the workshop:**
