# Supplementary material
Source: MDPI journal article supplement (https://www.mdpi.com/2071-1050/12/4/1532)
Supplement: s1 [file s1]

| Quotation  | I think that I am doing enough for the environment | I think that my community is doing enough to protect the environment | I think that businesses are doing enough to protect the environment | I think that national policy makers are doing enough to protect the environment | I think that EU policy makers are doing enough to protect the environment | I am now more aware of biodiversity and issues related to it | I am now more aware of solutions for biodiversity problems | I am worried about the environment | I think it is important to protect the environment | I think it is important to promote citizen participation in EU policy making | I think it is important to promote citizen participation in national policy making | I think it is important to promote citizen participation in local municipality policy making | I felt comfortable during the event and was able to express my thoughts | I would be willing to take part in a similar citizen participation event again | An overall score for the event |
|------------|----------------------------------------------------|----------------------------------------------------------------------|---------------------------------------------------------------------|---------------------------------------------------------------------------------|---------------------------------------------------------------------------|--------------------------------------------------------------|------------------------------------------------------------|------------------------------------|----------------------------------------------------|------------------------------------------------------------------------------|------------------------------------------------------------------------------------|----------------------------------------------------------------------------------------------|-------------------------------------------------------------------------|--------------------------------------------------------------------------------|--------------------------------|
| 1          | 7                                                  | 17                                                                   | 22                                                                  | 28                                                                              | 13                                                                        | 9                                                            | 6                                                          | 11                                 | 29                                                 | 24                                                                           | 22                                                                                 | 24                                                                                           | 3                                                                       | 6                                                                              | 0                              |
| 2          | 33                                                 | 41                                                                   | 29                                                                  | 23                                                                              | 19                                                                        | 22                                                           | 21                                                         | 18                                 | 1                                                  | 9                                                                            | 6                                                                                  | 4                                                                                            | 6                                                                       | 5                                                                              | 1                              |
| 3          | 42                                                 | 35                                                                   | 32                                                                  | 38                                                                              | 56                                                                        | 14                                                           | 5                                                          | 5                                  | 0                                                  | 8                                                                            | 2                                                                                  | 1                                                                                            | 6                                                                       | 4                                                                              | 7                              |
| 4          | 12                                                 | 4                                                                    | 14                                                                  | 8                                                                               | 8                                                                         | 25                                                           | 11                                                         | 13                                 | 9                                                  | 14                                                                           | 4                                                                                  | 4                                                                                            | 14                                                                      | 15                                                                             | 14                             |
| 5          | 4                                                  | 1                                                                    | 1                                                                   | 1                                                                               | 2                                                                         | 25                                                           | 8                                                          | 50                                 | 58                                                 | 42                                                                           | 10                                                                                 | 11                                                                                           | 63                                                                      | 63                                                                             | 69                             |
| Not filled | 3                                                  | 3                                                                    | 3                                                                   | 3                                                                               | 3                                                                         | 6                                                            | 11                                                         | 4                                  | 4                                                  | 4                                                                            | 18                                                                                 | 18                                                                                           | 9                                                                       | 8                                                                              | 10                             |
| Total      | 101                                                | 101                                                                  | 101                                                                 | 101                                                                             | 101                                                                       | 101                                                          | 62                                                         | 101                                | 101                                                | 101                                                                          | 62                                                                                 | 62                                                                                           | 101                                                                     | 101                                                                            | 101                            |
